# Supplementary material for: A Comparative Study of Physicochemical, Aroma, and Color Profiles Affecting the Sensory Properties of Grape Juice from Four Chinese Vitis vinifera × Vitis labrusca and Vitis vinifera Grapes
Source: MDPI journal article supplement (doi:10.3390/foods13233889), 2024-12-02
Supplement: s1 [file foods-3303837-supplementary.pdf › foods-3303837-supplementary.pdf]

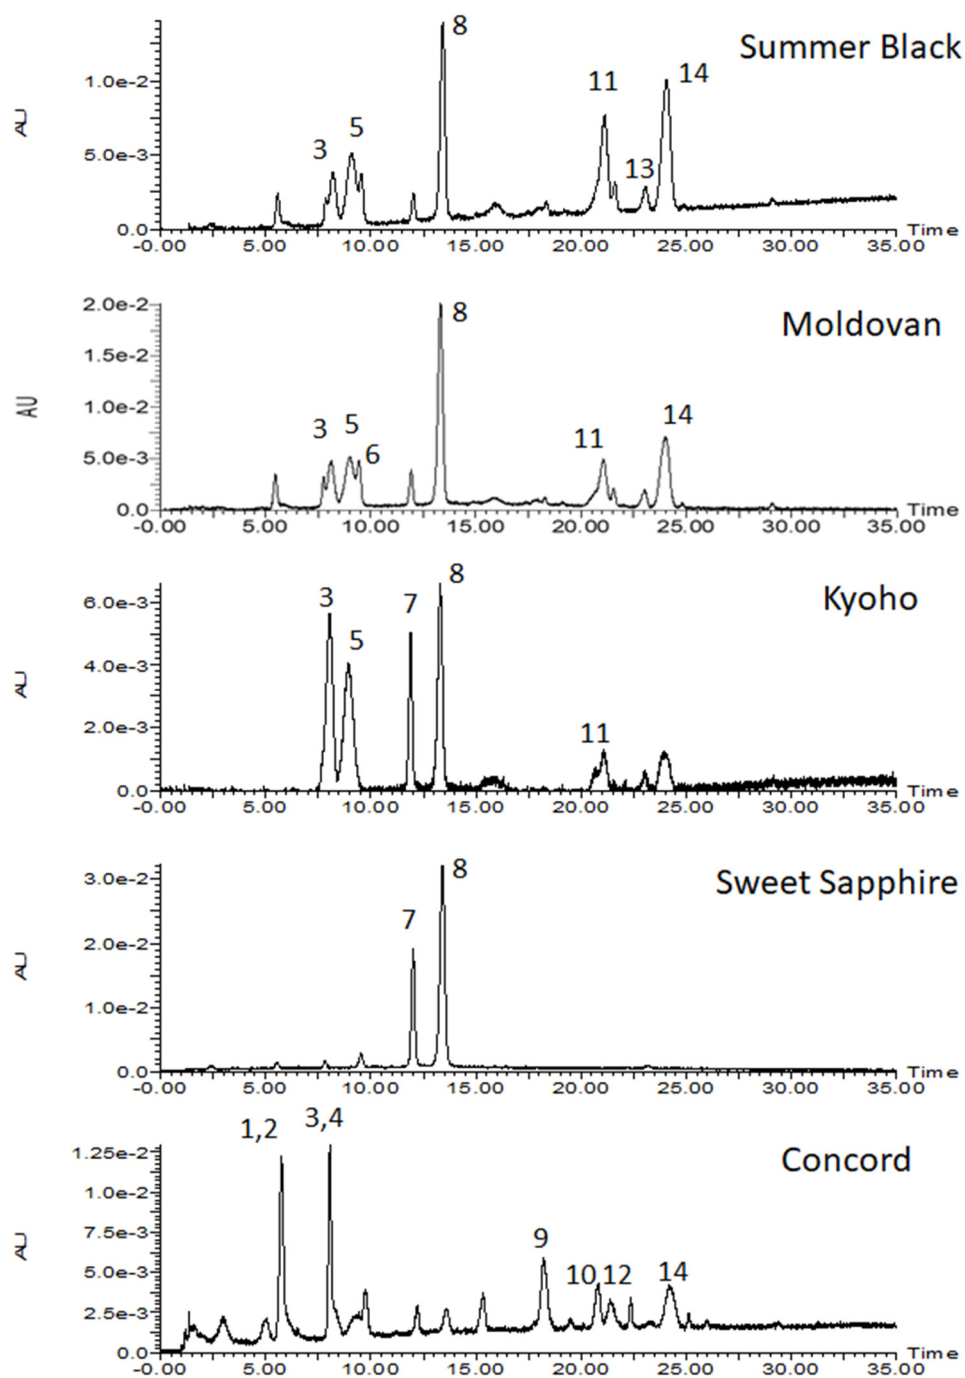

**Figure S1.** Chromatograms of anthocyanin from five grape varieties. Overlapped peaks in the chromatogram were converted based on the mass spectrometry area.

**Table S1.** Major anthocyanin compounds (percentage >5% in 520 nm) of five grape varieties.

| No. | Retention time (min) | $\lambda_{\text{max}}$ (nm) | [M] (m/z <sup>+</sup> ) | MS <sup>2</sup> (m/z) | Natural Loss | Compounds                               |
|-----|----------------------|-----------------------------|-------------------------|-----------------------|--------------|-----------------------------------------|
| 1   | 5.80                 | 520                         | 465                     | 303                   | 162          | delphinidin 3-glucoside                 |
| 2   | 6.12                 | 521                         | 641                     | 317                   | 324          | petunidin 3,5-diglucoside               |
| 3   | 8.06                 | 514                         | 625                     | 301                   | 324          | peonidin 3,5-diglucoside                |
| 4   | 8.20                 | 516                         | 449                     | 287                   | 162          | cyanidin 3-glucoside                    |
| 5   | 9.00                 | 523                         | 655                     | 331                   | 324          | malvidin 3,5-diglucoside                |
| 6   | 9.59                 | 524                         | 479                     | 317                   | 162          | petunidin 3-glucoside                   |
| 7   | 12.14                | 512                         | 463                     | 301                   | 162          | peonidin 3-glucoside                    |
| 8   | 13.53                | 525                         | 493                     | 331                   | 162          | malvidin 3-glucoside                    |
| 9   | 18.19                | 528                         | 773                     | 303                   | 470          | delphinidin 3-(coumaroyl)-5-diglucoside |
| 10  | 20.89                | 527                         | 757                     | 287                   | 470          | cyanidin 3-(coumaroyl)-5-diglucoside    |
| 11  | 21.23                | 529                         | 817                     | 331                   | 486          | malvidin 3-(caffeoyl)-5-diglucoside     |
| 12  | 21.38                | 530                         | 787                     | 317                   | 470          | petunidin 3-(coumaroyl)-5-diglucoside   |
| 13  | 23.92                | 529                         | 771                     | 301                   | 470          | peonidin 3-(coumaroyl)-5-diglucoside    |
| 14  | 24.41                | 530                         | 801                     | 331                   | 470          | malvidin 3-(coumaroyl)-5-diglucoside    |

**Table S2.** Standard curve.

| Compounds     | Standard curve         | R <sup>2</sup> |
|---------------|------------------------|----------------|
| Gallic acid   | y = 0.1019 x + 0.0413  | 0.9990         |
| Sucrose       | y = 5106090 x - 49349  | 0.9933         |
| Glucose       | y = 3440186 x - 97918  | 0.9960         |
| Fructose      | y = 5095237 x + 643961 | 0.9915         |
| Ascorbic acid | y = 65444x + 6253.1    | 0.9999         |
| Oxalic acid   | y = 16452578 x - 10984 | 1.0000         |
| Tartaric acid | y = 458984 x - 24802   | 0.9975         |
| Malic acid    | y = 1000497 x - 53573  | 0.9973         |
| Acetic acid   | y = 624934x - 1934.8   | 1.0000         |
| Citric acid   | y = 1041228 x - 462    | 1.0000         |
| Succinic acid | y = 213491 x - 3598    | 0.9983         |
